# Supplementary material
Source: PubMed Central journal article supplement (PMC1464355)

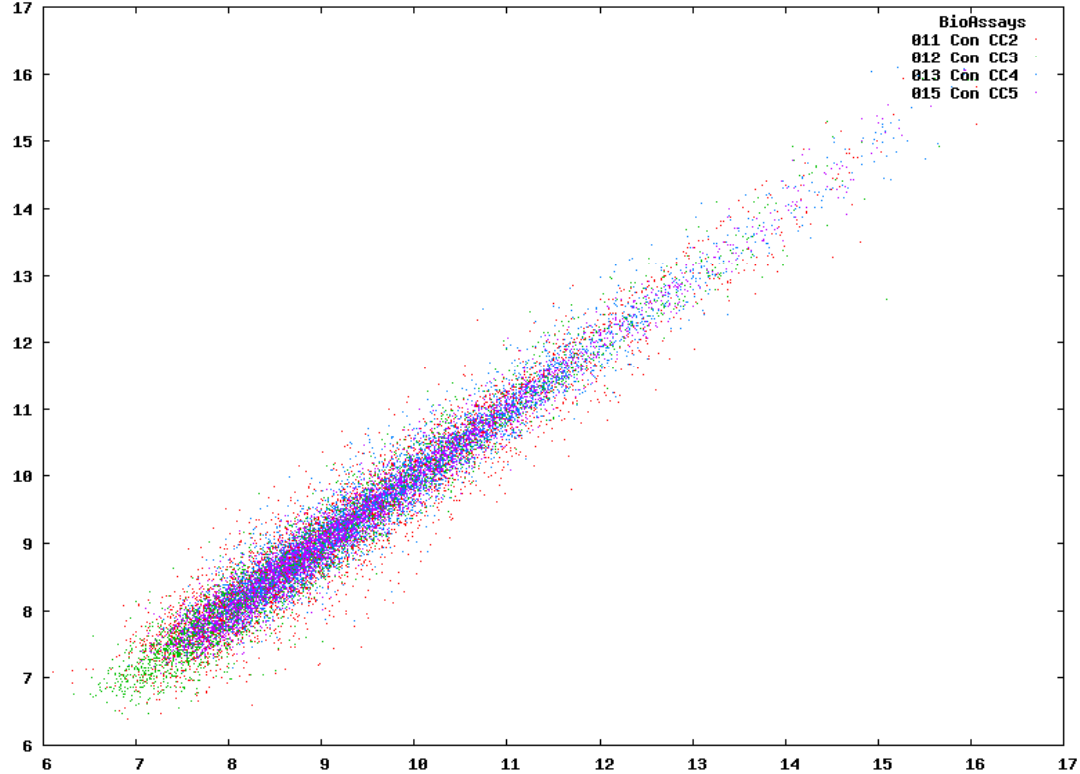

Supplement: pnas_0508895103_1.pdf [file pnas_0508895103_1.pdf]
